# Supplementary material for: Gold nanoparticles supported on nanoscale amine-functionalized MIL-101(Cr) as a highly active catalyst for epoxidation of styrene
Source: Royal Society of Chemistry journal article supplement (doi:10.1039/c6ra24458k), 2016-01-01
Supplement: c6ra24458k1.pdf [file c6ra24458k1.pdf]

## Electronic Supplementary information

### Gold nanoparticles supported on nanoscale amine-functionalized MIL-101(Cr) as a highly active catalyst for epoxidation of styrene

Mrinal Saikia<sup>a,b</sup>, Vasily Kaichev<sup>c</sup> and Lakshi Saikia<sup>\*a,b</sup>

<sup>a</sup>Materials Science and Technology Division,  
CSIR-North East Institute of Science and Technology  
Jorhat – 785006, Assam, India

<sup>b</sup>Academy of Scientific and Innovative Research, Chennai, India

<sup>c</sup>Surface Science Laboratory, Boreskov Institute of Catalysis,  
Lavrentieva Ave. 5, 630090, Novosibirsk, Russia

\*Corresponding author. Tel.: +91 376 2370 081; fax. +91 376 2370 011

\*E-mail address: [l.saikia@gmail.com](mailto:l.saikia@gmail.com)

#### Table of contents

1. Fig S1 UV spectrum of H<sub>2</sub>AuCl<sub>4</sub> before adsorption (blue) and after adsorption (black) on NH<sub>2</sub>-MIL-101(Cr).
2. Fig S2 NH<sub>2</sub>-MIL-101(Cr) for H<sub>2</sub>AuCl<sub>4</sub> absorption (a) NH<sub>2</sub>-MIL-101(Cr) was added to H<sub>2</sub>AuCl<sub>4</sub> solution (centrifuged after 3h) and (b) H<sub>2</sub>AuCl<sub>4</sub> solution.
3. Fig S3 Zeta potential analysis of the support for determining IEP value.
4. Fig S4 CO<sub>2</sub>-TPD profile of NH<sub>2</sub>-MIL-101(Cr)
5. Fig S5 FE-SEM images of (a) NH<sub>2</sub>-MIL-101 (Cr), (b) Fresh Au/NH<sub>2</sub>-MIL-101(Cr) and (c) Recovered Au/NH<sub>2</sub>-MIL-101(Cr)
6. Fig S6 FT-IR Spectra of NH<sub>2</sub>-MIL-101(Cr) (black), Fresh Au/NH<sub>2</sub>-MIL-101(Cr) (red) and recovered Au/NH<sub>2</sub>-MIL-101(Cr) (blue)
7. Fig S7 XPS spectrum of metallic gold nanoparticles supported on NH<sub>2</sub>-MIL-101(Cr)
8. Fig S8 BJH plot of Au/NH<sub>2</sub>-MIL-101(Cr)
9. Fig S9 Thermogravimetric (black) and derivative curve (blue) of Au/NH<sub>2</sub>-MIL-101(Cr)
10. Fig S10 EDS and mapping analysis of the recovered Au/NH<sub>2</sub>-MIL-101(Cr)
11. Fig S11 TEM images of the recovered Au/NH<sub>2</sub>-MIL-101(Cr)
12. Table S1 Effect of reaction time
13. Table S2 Epoxidation of styrene by TBHP in presence of different gold- based catalyst

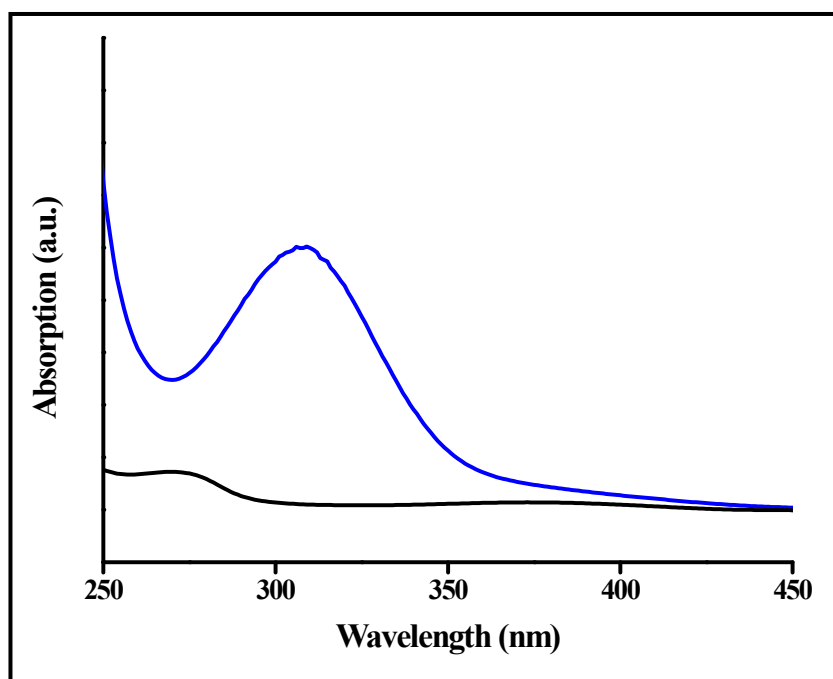

Fig S1 UV spectrum of  $\text{H[AuCl}_4\text{]}$  before adsorption (blue) and after adsorption (black) on  $\text{NH}_2\text{-MIL-101(Cr)}$

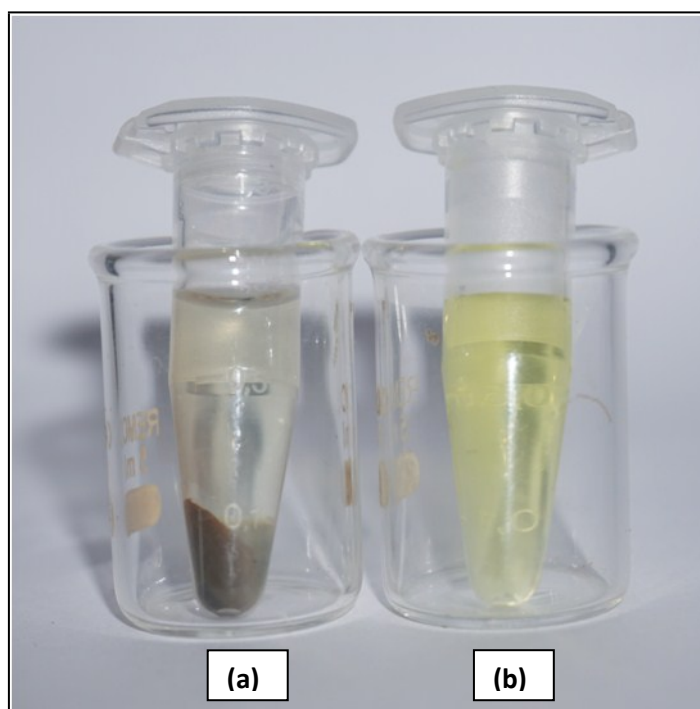

Fig S2  $\text{NH}_2\text{-MIL-101(Cr)}$  for  $\text{H[AuCl}_4\text{]}$  adsorption (a)  $\text{NH}_2\text{-MIL-101(Cr)}$  was added to  $\text{H[AuCl}_4\text{]}$  solution (centrifuged after 3h) and (b)  $\text{H[AuCl}_4\text{]}$  solution.

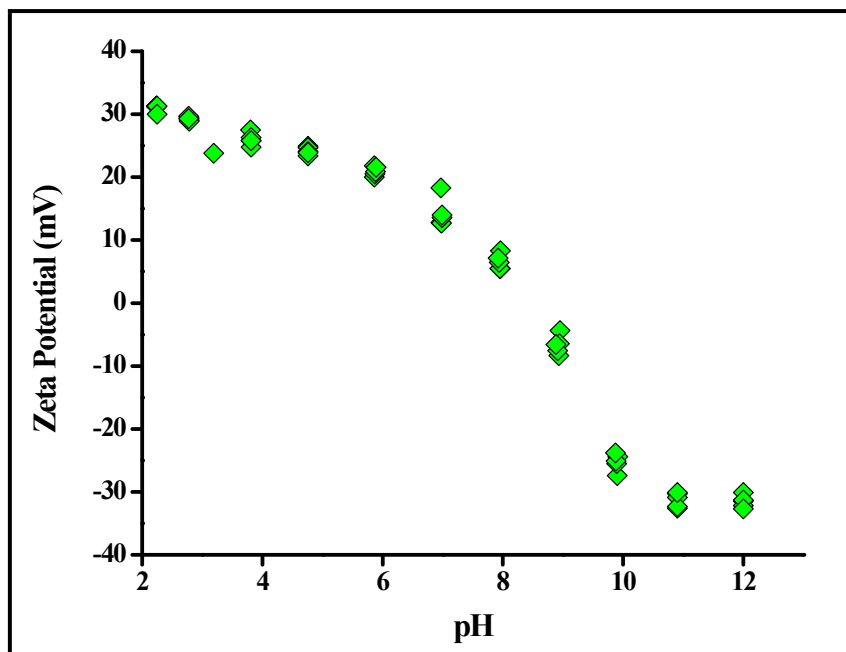

Fig S3 Zeta potential analysis of the support for determining IEP value.

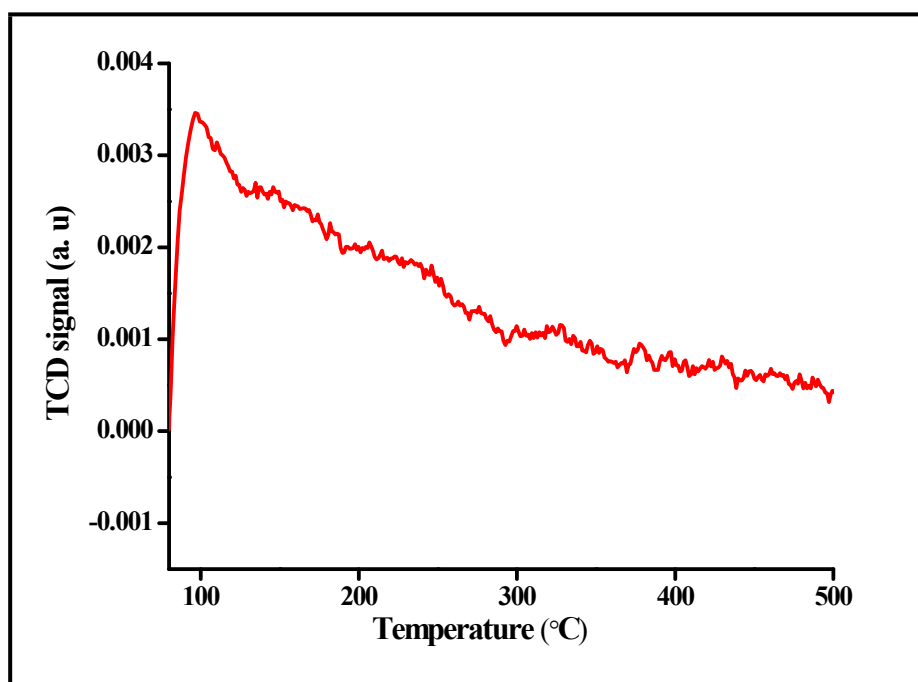

Fig S4 CO<sub>2</sub>-TPD profile of NH<sub>2</sub>-MIL-101(Cr)

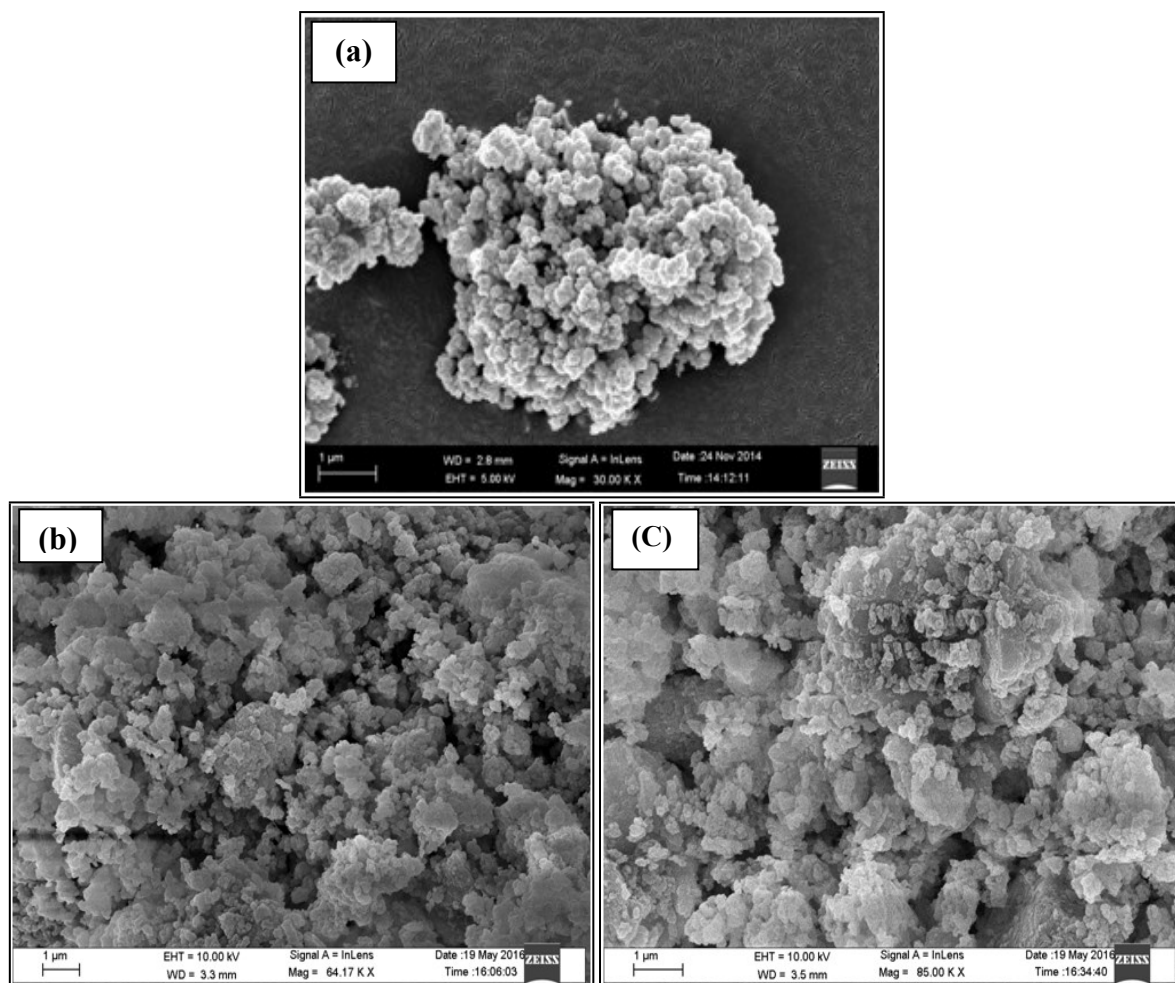

Fig S5 FE-SEM images of (a)  $\text{NH}_2\text{-MIL-101 (Cr)}$ , (b) Fresh  $\text{Au/NH}_2\text{-MIL-101(Cr)}$  and (C) Recovered  $\text{Au/NH}_2\text{-MIL-101(Cr)}$

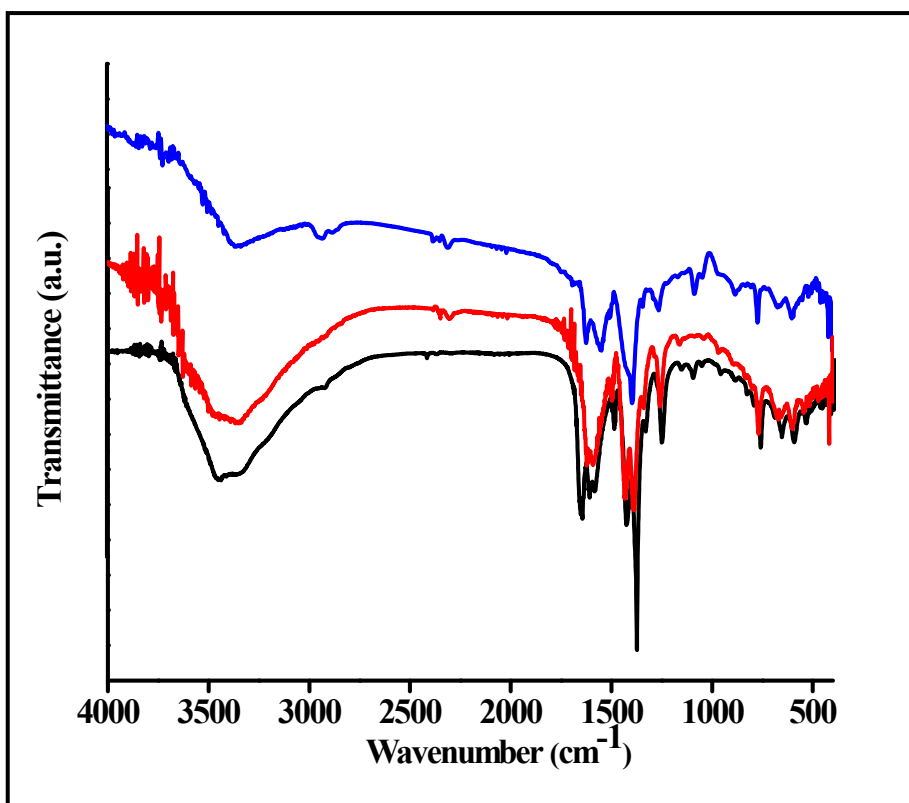

Fig S6 FT-IR Spectra of NH<sub>2</sub>-MIL-101(Cr) (black), Fresh Au/NH<sub>2</sub>-MIL-101(Cr) (red) and recovered Au/NH<sub>2</sub>-MIL-101(Cr) (blue)

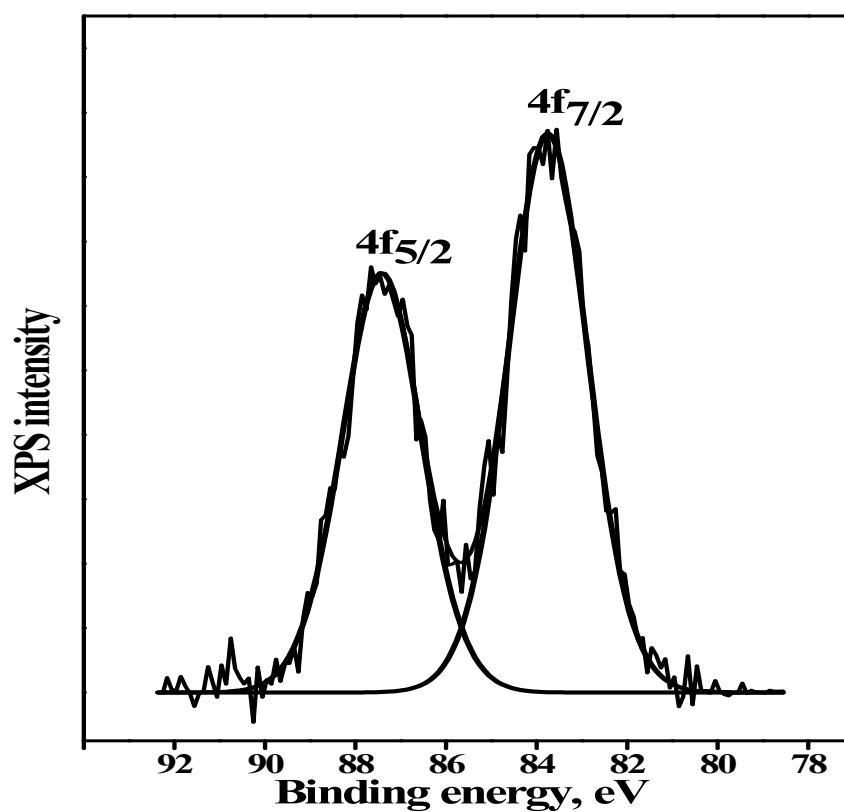

Fig S7 XPS spectrum of metallic gold nanoparticles supported on NH<sub>2</sub>-MIL-101(Cr)

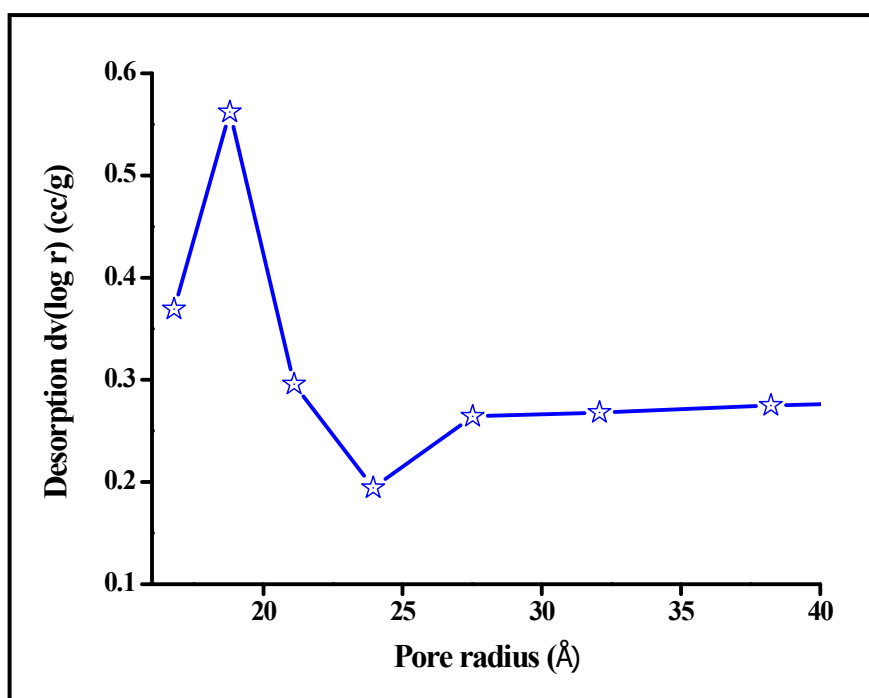

Fig S8 BJH plot of Au/NH<sub>2</sub>-MIL-101(Cr)

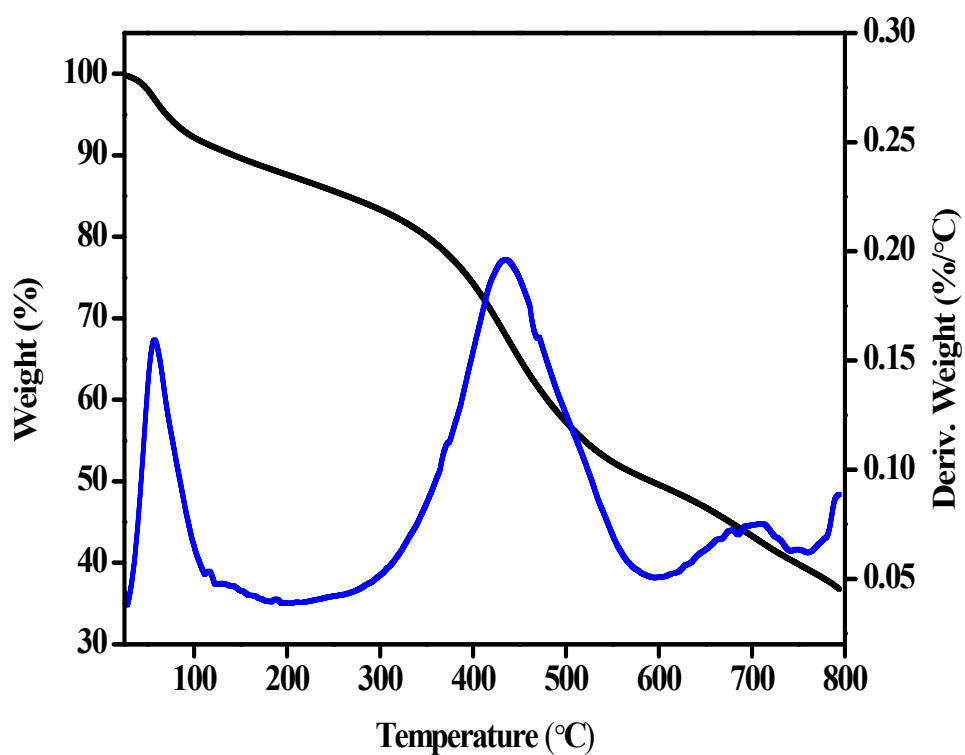

Fig S9 Thermogravimetric (black) and derivative curve (blue) of Au/NH<sub>2</sub>-MIL-101(Cr)

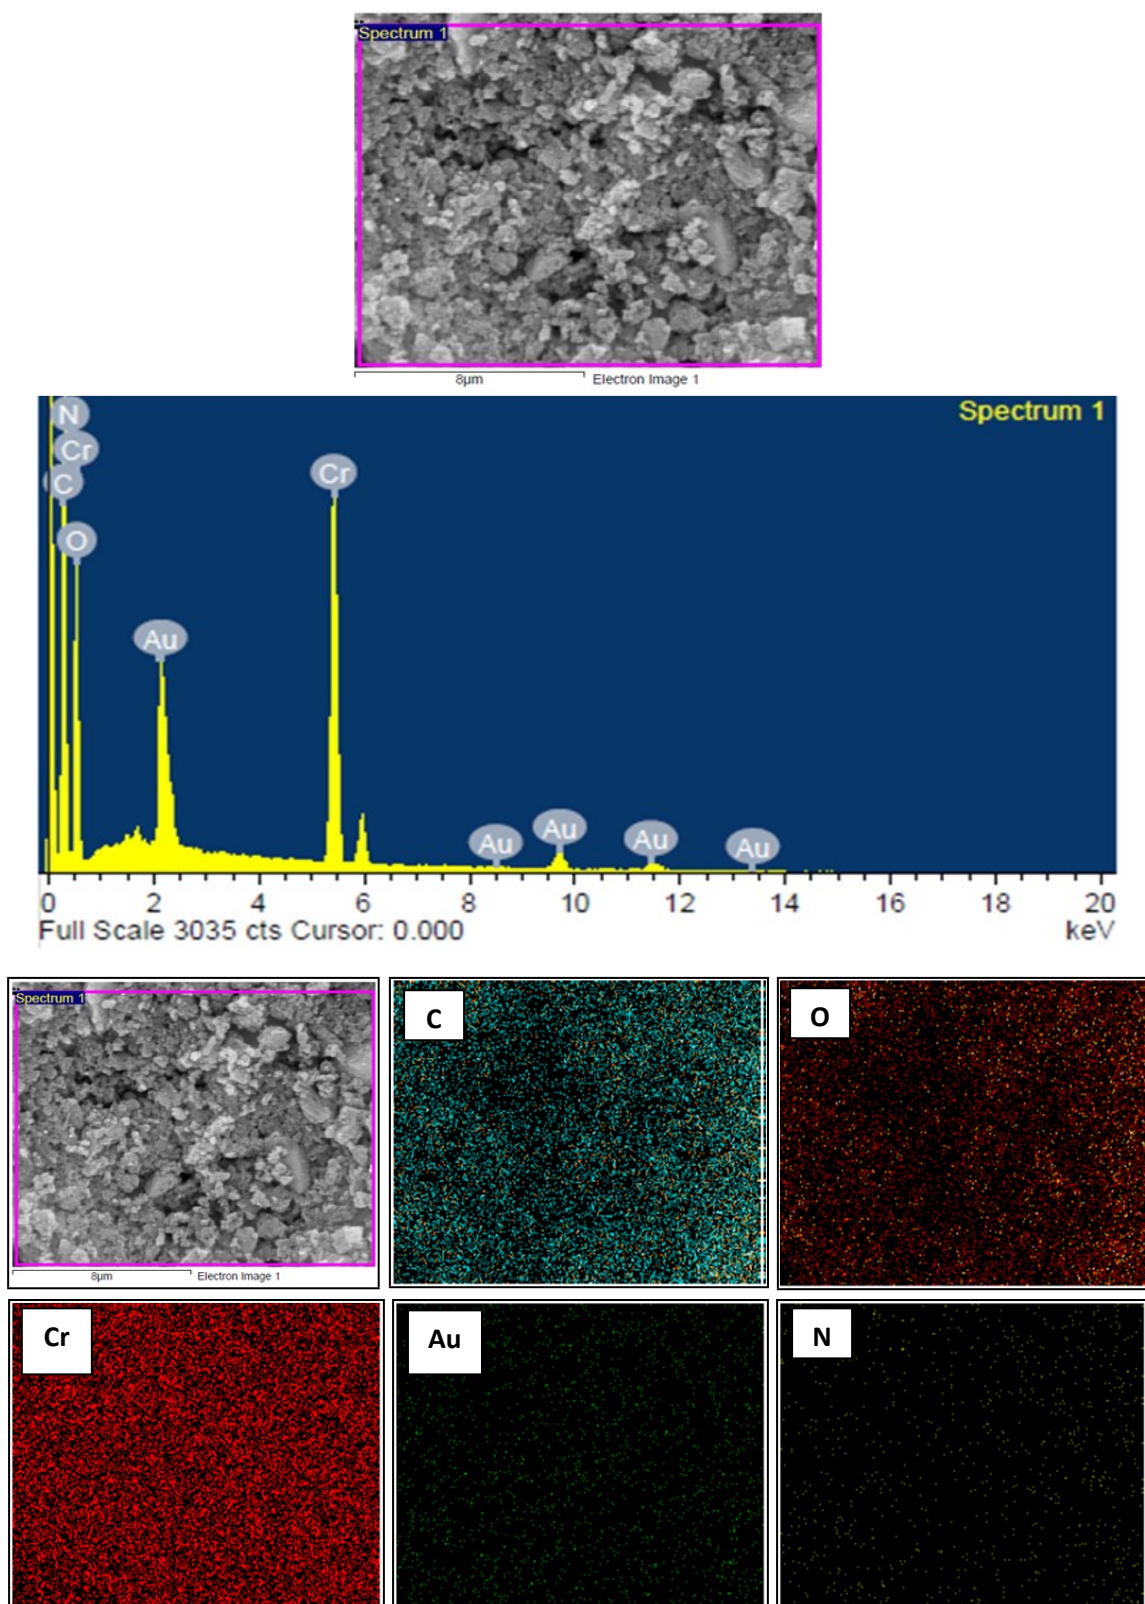

Fig S10 EDS and mapping analysis of the recovered Au/NH<sub>2</sub>-MIL-101(Cr)

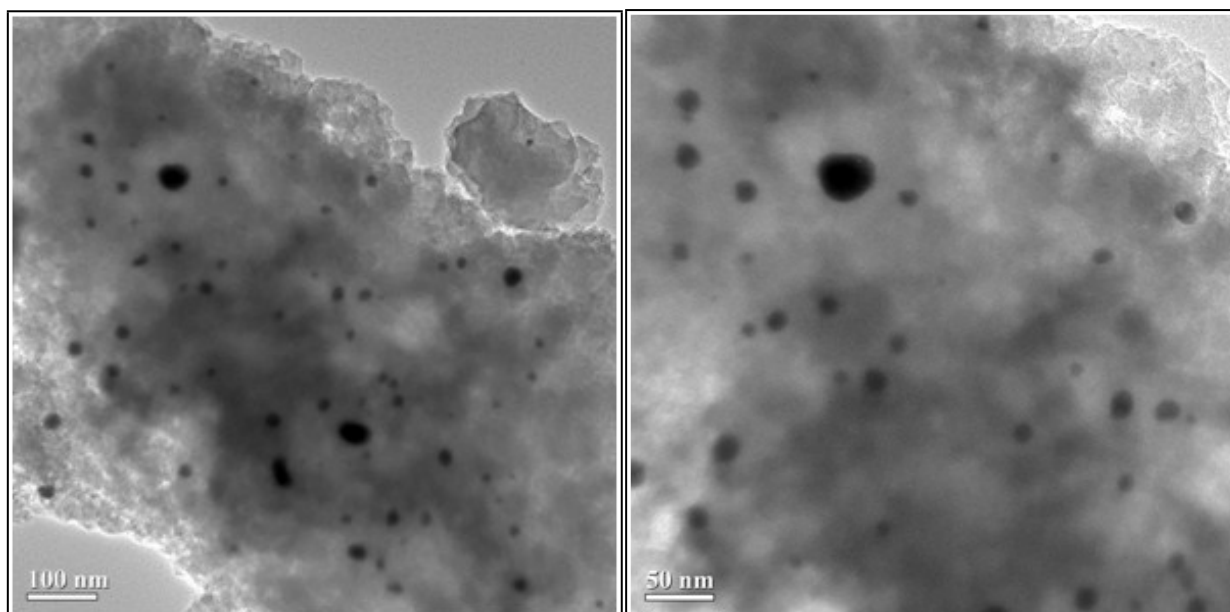

Fig S11 TEM images of the recovered Au/NH<sub>2</sub>-MIL-101(Cr)

Table S1 Effect of reaction time<sup>a</sup>

| Entry | Time (h) | Conversion (%) | Selectivity (%) |              |                    |                |
|-------|----------|----------------|-----------------|--------------|--------------------|----------------|
|       |          |                | Styrene oxide   | Benzaldehyde | Phenylacetaldehyde | Other products |
| 1     | 4        | 55.9           | 84.4            | 0.0          | 0.0                | 15.5           |
| 2     | 8        | 88.2           | 74.7            | 0.0          | 0.35               | 24.9           |
| 3     | 12       | 97.02          | 19.9            | 48.3         | 13.8               | 17.8           |

<sup>a</sup>Reaction condition: Styrene (1 mmol), TBHP (1.5 mmol), toluene (5 mL), Temperature (110° C), Au/NH<sub>2</sub>-MIL-101(Cr) (0.025 mol%), <sup>b</sup>GC conversion and selectivity

Table S2 Epoxidation of styrene by TBHP in presence of different gold- based catalyst

| Entry | Catalysts                                       | Conversion (%) | Selectivity <sup>a</sup> (%) | TOF (mol g <sup>-1</sup> h <sup>-1</sup> ) <sup>c</sup> | Ref.         |
|-------|-------------------------------------------------|----------------|------------------------------|---------------------------------------------------------|--------------|
| 1     | Au/CaO(HDP) <sup>b</sup>                        | 53.6           | 60.2                         | 0.23                                                    | 10           |
| 2     | Au/BaO (HDP)                                    | 55.9           | 53.5                         | 0.19                                                    | 10           |
| 3     | Au/SrO (HDP)                                    | 53.0           | 44.8                         | 0.15                                                    | 10           |
| 4     | Au/MgO                                          | 62.6           | 54.3                         | 0.28                                                    | 25           |
| 5     | Au- <i>meso</i> -Al <sub>2</sub> O <sub>3</sub> | 84.3           | 69.0                         | 0.35                                                    | 25           |
| 6     | Au-PMO-SBA-15                                   | 94.8           | 75.0                         | 0.40                                                    | 25           |
| 7     | Au/SiO <sub>2</sub>                             | 80.6           | 38.1                         | 0.28                                                    | A            |
| 8     | GNP/PEG6000-VIC                                 | 20.4           | 62.0                         | 1.32                                                    | B            |
| 9     | Au/Yb <sub>2</sub> O <sub>3</sub> (HDP)         | 63.5           | 54.8                         | 0.17                                                    | C            |
| 10    | Au/NH <sub>2</sub> -MIL-101(Cr)                 | 88.2           | 74.7                         | 1.69                                                    | Present Work |

<sup>a</sup> Selectivity w.r.t styrene oxide

<sup>b</sup> HDP= homogeneous deposition–precipitation

<sup>c</sup>Turnover frequency (TOF) is calculated by the expression [product]/[Au]×time (h<sup>-1</sup>)



## References

- A. L. Guo, R. Zhang, C. Chen, J. Chen, X. Zhao, A. Chen, X. Liu, Y. Xiu and Z. Hou, *Phys. Chem. Chem. Phys.*, 2015, **17**, 6406.
- B. A. Zeng, Y. Li, S. Su, D. Li, B. Hou and N. Yu, *J. Catal.*, 2014, **319**, 163.
- C. V. R. Choudhary, D. K. Dumbre, N. S. Patil, B. S. Uphade and S. K. Bhargava, *J. Catal.*, 2013, **300**, 217.
